# Supplementary material for: A 305-year continuous monthly rainfall series for the Island of Ireland (1711–2016)
Source: Copernicus journal article supplement (doi:10.5194/cp-2017-142), 2017-11-10
Supplement: Supplementary file 1 [file cp-2017-142-supplement.pdf]

No. 77, April 1979

XEROX COPY  
of  
18375

## Monthly and Annual Rainfall for Ireland, 1711-1977

A.F. Jenkinson, W. Shackleton and S. Lawson

1. Introduction

A table of monthly and annual rainfall for Ireland, 1711 to 1977 is given at the end of this paper. The years 1881 to 1977 have been compiled mainly from published official records, and are added for completeness to the series for the years 1711 to 1880, which has been derived from individual station records, some of them published. This early series may be regarded as an initial essay on the earlier rainfall climate of Ireland.

2. Reduction of the data2.1 Analysis of monthly falls

In any year, monthly and annual rainfalls for a given station in a region are usually expressed as percentages of the annual average rainfall (AAR) for a normal period. Table 1 shows an example of the analysis, for 5 Irish stations for 1839, with AAR for the normal period 1792-1839.

Table 1. Monthly and annual rainfall for 1839, as percentage of AAR for the normal period 1792-1839.

|                      | Jan | Feb | Mar | Apr | May | June | July | Aug  | Sept | Oct  | Nov  | Dec  | Year |
|----------------------|-----|-----|-----|-----|-----|------|------|------|------|------|------|------|------|
| Belfast              | 7.8 | 7.2 | 8.9 | 4.2 | 2.7 | 10.4 | 11.7 | 11.2 | 16.1 | 11.3 | 11.9 | 10.5 | 114  |
| Markree              | 9.5 | 7.2 | 7.6 | 5.9 | 2.4 | 7.4  | 5.4  | 8.6  | 14.6 | 6.9  | 9.6  | 4.9  | 90   |
| Cork                 | 4.4 | 9.2 | 8.7 | 7.1 | 0.3 | 9.8  | 17.2 | 7.6  | 11.3 | 12.5 | 9.7  | 17.1 | 115  |
| Dublin               | 8.2 | 4.7 | 7.8 | 4.0 | 2.7 | 7.2  | 19.6 | 14.0 | 19.3 | 12.6 | 13.1 | 10.7 | 124  |
| Armagh               | 2.1 | 3.7 | 5.1 | 4.2 | 2.1 | 12.3 | 12.2 | 10.9 | 14.3 | 17.3 | 9.3  | 14.6 | 108  |
| Mean                 | 6.4 | 6.4 | 7.6 | 5.1 | 2.0 | 9.4  | 13.2 | 10.5 | 15.1 | 12.1 | 10.7 | 11.5 | 110  |
| Internal percentages | 5.8 | 5.8 | 6.9 | 4.6 | 1.8 | 8.6  | 12.0 | 9.6  | 13.7 | 11.0 | 9.7  | 10.5 | 100  |

The sum of the mean monthly percentages of AAR is identical with the mean of the annual percentages of AAR. This result can be surmised by noting the annual percentage of AAR, 110 percent, and by recording the mean monthly percentages as internal percentages of the annual fall, as in the last line of Table 2.

Very nearly the same results are obtained by meaning the internal percentages for each station. These are shown in Table 2.

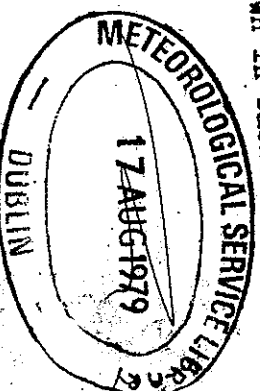

Table 2. Monthly falls for 1839 as internal percentages of the annual fall for

|          | <u>each station</u> |     |     |     |     |      |      |      |      |      |      |      |     |
|----------|---------------------|-----|-----|-----|-----|------|------|------|------|------|------|------|-----|
|          | Jan                 | Feb | Mar | Apr | May | June | July | Aug  | Sept | Oct  | Nov  | Dec  |     |
| Belfast  | 6.8                 | 6.3 | 7.8 | 3.7 | 2.4 | 9.1  | 10.3 | 9.8  | 14.1 | 9.9  | 10.4 | 9.2  | 100 |
| Markeere | 10.6                | 8.0 | 8.4 | 6.6 | 2.7 | 8.2  | 6.0  | 9.6  | 16.2 | 7.7  | 10.7 | 5.4  | 100 |
| Cork     | 3.8                 | 8.0 | 7.6 | 6.2 | 0.3 | 8.5  | 15.0 | 6.6  | 9.8  | 10.9 | 8.4  | 14.9 | 100 |
| Dublin   | 6.6                 | 3.8 | 6.3 | 3.2 | 2.2 | 5.8  | 15.8 | 11.3 | 15.6 | 10.2 | 10.6 | 8.6  | 100 |
| Armagh   | 1.9                 | 3.4 | 4.7 | 3.9 | 1.9 | 11.4 | 11.3 | 10.1 | 13.2 | 16.0 | 8.6  | 13.5 | 100 |
| Mean     | 5.9                 | 5.9 | 7.0 | 4.7 | 1.9 | 8.6  | 11.7 | 9.5  | 13.8 | 10.9 | 9.7  | 10.3 | 100 |

There are several advantages in this procedure:

- (1) If monthly falls are processed in this way, year by year, only the annual falls remain to be analysed, and full attention can be given to the difficulties caused for example by unrepresentative changes at a given station, e.g. changes in site or exposure or gauge etc, none of which are likely to affect materially the internal percentages in any year.
- (2) Stations which have only a few years of record, even a single year, can be processed at once in the internal percentage analysis, leaving the estimation of AAR for the station to the time when annual falls are analysed.
- (3) The annual rainfall analysis may show that a station record must be regarded (usually for one or other of the causes in (1)) as comprising two or more discontinuous periods each with appropriate AAR. In this case the analysis of annual rainfall is best done by regarding these periods as being from different stations at the same location; but once again this does not affect the internal percentage analysis.

Glasspool (1931) used the internal percentage method in producing his well-known regional series for England and Wales, 1727 to 1931. Glasspool (1924) also gave monthly and annual values for Scotland and Ireland for 1881 to 1924; and also produced the series of annual percentage maps (normal period 1881-1915) for the British Isles for 1868 to 1923, published in 1926 by the Royal Meteorological Society.

## 2.2 Analysis of annual falls

The first step in the analysis is to take a period of 20 to 50 years, half of it overlapping with the Glasspool series for Ireland, 1881-1924; and to continue this overlapping back to earliest records. The periods taken may be varied according to the rate of change of stations, with the longer period taken as optimum.

In the (50 year) period, a first estimate of AAR for a station may be taken as the arithmetic mean of the available annual falls, and the individual years recorded as percentages of this AAR. The mean of the station percentage values for a given year is taken as the estimate of the

regional percentage of AAR for that year. Returning now to an individual station, a new estimate of AAR can be obtained from each year with data, using the regional percentage for that year; then the mean for all data years gives the next estimate of AAR.

Three iterations of these two computational steps will give final estimates of (1) Station AAR (2) Station annual percentages of AAR (3) Regional annual percentages of AAR.

The station annual percentages are mapped for each year, or an equivalent computer analysis performed, e.g. as in the U.K. Flood Studies Report (Vol II, Jenkinson and Jackson, 1975). This will show up discontinuities or other errors. Stations with discontinuities are best treated as two (or more) different records, and individual errors amended by the usual elementary methods. The whole process is now repeated.

A similar analysis is done for each overlapping period, and the regional annual percentages combined into a long series which was then further calibrated against relevant established series, e.g. Glaspoole's England and Wales series. The individual station records may also be combined into long series, with missing observations, and annual maps drawn.

These methods were used to produce the final Ireland series of annual falls, and these were expressed as percentages of AAR for 1826-1975. But the nature of the data necessitated other forms of analysis, and these will be discussed in a general account of the data used in different periods.

### 3. An account of the data used

3.1 Derry, 1711-1725. Dixon (1959) analysed the weather diary of Thomas Neve, kept at Ballyneil, County Derry, and published monthly and annual totals, together with days of reported precipitation. These have been processed to give internal percentages for each year; but it has been found impossible to calibrate the annual falls, and annual days of precipitation were used in their place to represent the year to year variation of annual rainfall.

3.2 Crosby, 1711-15, 1718-27. Nicholas Blundell's Diurnal (1968, 1970, 1972) includes for the years 1710 to 1727 monthly and annual weather summaries, mainly for London or Flanders for the years 1716 and 1717, but otherwise at Crosby, near Liverpool.

In view of the strong correlations between Ireland rainfall and that of (1) NW England (2) SW Scotland, especially with eastern and northern Ireland respectively, it has been the practice in compiling the Ireland series, in the period before 1840 when data were relatively scarce, to include regional values for both NW England and SW Scotland as single stations in the Ireland analysis. This applies to the period 1792-1839 for SW Scotland, and 1757-1839 for NW England; but the Crosby data were also used as a NW England series for 1711-15, 18-27. The Crosby data were analysed in the same way as the Dublin weather summaries published by Rutty (see section 3.4).

3.3 Castle Dobbs, Antrim, 1726-27. M.S. monthly and annual falls available in the Meteorological Office. An internal monthly analysis was made. The annual falls were not used.

3.4 Dublin, 1716-65. Rutty (1770) published a chronological history of the weather in Dublin for 1716-65, including brief monthly and seasonal weather

summaries. The summaries were read completely through twice, to become familiar with his expressions. Then they were assessed, giving for each month a ranking for rainfall on a scale 1 (exceptionally dry) to 9 (exceptionally wet); these were made to accord with the corresponding seasonal summaries. This analysis was destroyed, and the assessment done again, and also destroyed. A third assessment was taken as final. For the month of December the frequencies of rankings are given in Table 3.

Table 3. Frequencies of rankings of December rainfall, Dublin, December 1716-65

| Rank      | 1 | 2 | 3 | 4 | 5 | 6  | 7 | 8 | 9  |
|-----------|---|---|---|---|---|----|---|---|----|
| Frequency | 0 | 2 | 8 | 9 | 8 | 15 | 6 | 1 | 1  |
|           |   |   |   |   |   |    |   |   | 50 |

A comparable period of 50 years was sought, and 1840-89 was chosen. Internal percentage falls for each month were ranked. For December, these are given in Table 4.

Table 4. Correspondence of Dublin rankings for December 1716-65 with rankings of

| <u>Internal percentages for Ireland, December 1840-89</u> |     |     |     |     |      |      |      |      |  |     |
|-----------------------------------------------------------|-----|-----|-----|-----|------|------|------|------|--|-----|
| Dublin ranks                                              | 2   | 3   | 4   | 5   | 6    | 7    | 8    | 9    |  |     |
| Frequencies                                               | 2   | 8   | 9   | 8   | 15   | 6    | 1    | 1    |  |     |
| Ranked percentages<br>(as per mille)                      | 32  | 37  | 63  | 83  | 100  | 132  | 182  | 187  |  |     |
|                                                           | 36  | 43  | 65  | 89  | 103  | 136  |      |      |  |     |
|                                                           |     | 51  | 66  | 91  | 105  | 139  |      |      |  |     |
|                                                           |     | 53  | 68  | 93  | 108  | 145  |      |      |  |     |
|                                                           |     | 54  | 71  | 96  | 108  | 157  |      |      |  |     |
|                                                           |     |     |     |     |      |      |      |      |  |     |
|                                                           |     |     | 55  | 74  | 96   | 109  | 172  |      |  |     |
|                                                           |     |     | 61  | 75  | 97   | 111  |      |      |  |     |
|                                                           |     |     | 61  | 82  | 99   | 112  |      |      |  |     |
|                                                           |     |     |     | 83  |      | 113  |      |      |  |     |
|                                                           |     |     |     |     |      |      |      |      |  | 113 |
|                                                           |     |     |     |     |      |      |      |      |  |     |
|                                                           |     |     |     |     |      |      |      |      |  | 114 |
|                                                           |     |     |     |     |      |      |      |      |  | 117 |
|                                                           |     |     |     |     |      |      |      |      |  | 119 |
|                                                           |     |     |     |     |      |      |      |      |  | 120 |
|                                                           |     |     |     |     |      |      |      |      |  | 128 |
| Mean percentage                                           | 3.4 | 5.2 | 7.2 | 9.3 | 11.2 | 14.7 | 18.2 | 18.7 |  |     |

These values were then used, as percentage of AAR, for each December ranking; and other months were treated in the same way. This ensured that the mean annual percentage of AAR for the 50 years 1716-65 was 100; and

that the block of estimated annual rainfalls would need only minor re-calibration in the final annual rainfall analysis. The assessments for 1723 and 1756 are given in Table 5.

Table 5. Dublin, assessed percentages of AAR for 1716-65

|      | Jan  | Feb | Mar | Apr  | May  | June | July | Aug  | Sept | Oct  | Nov  | Dec | Year  |
|------|------|-----|-----|------|------|------|------|------|------|------|------|-----|-------|
| 1723 | 8.8  | 9.0 | 6.5 | 5.8  | 2.1  | 3.4  | 4.6  | 4.7  | 2.3  | 4.6  | 12.3 | 7.2 | 71.3  |
| 1756 | 14.0 | 6.8 | 6.5 | 14.3 | 11.0 | 13.1 | 9.3  | 13.2 | 8.6  | 14.2 | 5.1  | 5.2 | 121.3 |

The whole set of monthly and annual percentages were processed to give internal percentages for each year; and the annual percentages were put as a station data set for the analysis of annual falls.

Referring now to the Crosby data (3.3 above), the same procedure was adopted, but for the rankings the months were grouped into six pairs, January and February, and so on; and the Ireland internal percentage set for the same years were used in the comparison procedures.

3.5 NW England, 1757-1839. Only actual rainfall data were used, and all MS data in the possession of the Meteorological Office were re-assessed and analysed as in 2.1 and 2.2. The regional set was used as a single Ireland station for the period 1757-1839. For the period 1766-1791 it was in fact the only series to represent Ireland.

3.6 Scotland, 1757-1977. All MS data of monthly and annual falls for the period up to 1870 were gathered together and re-assessed by the methods of 2.1 and 2.2, and for completeness combined with the (enlarged) Glasspool series for the years 1868 onwards. For the period before 1870 however, regional analyses were due for SW Scotland, N Scotland and E Scotland, and the SW Scotland series for 1792-1839 was used as a single Ireland station.

The series described in 3.5 and 3.6 will be given in a subsequent publication.

3.7 Irish stations, 1792-1839. Dixon (1953) gives Dublin annual rainfall, and the monthly data are either given in the references quoted by Dixon or are available as MS data in the Meteorological Office. Observations are available for somewhere in the city of Dublin for the whole of this period; and in addition monthly and annual falls are available for: Castlecomer, Kilkenny, 1813-30; Malahide, 1823-24; Derry, 1795-1801; Belfast, 1814-15, 1818 onwards; Armagh, 1836 onwards; Cork, 1825-32, 1836 onwards; Markree, 1833 onwards.

3.8 From 1840 the number of stations increases, rapidly from 1845 onwards, all available as MS data. Monthly and annual station falls for 1840-1880 were processed as in 2.2 to give internal percentages, to add on to Glasspool's data from 1881 onwards. The annual falls up to 1899 were analysed as in 2.3, and additional analyses were done to establish the ratio of AAR 1870-99 to the Glasspool AAR 1881-1915.

3.9 1881-1939 for monthly internal percentages 1900-1939 for annual percentages: from Glasspool's data to 1924, with continuation in British Rainfall.

3.10 1940-48. Annual rainfall maps (with percentage isopleths) are available in British Rainfall for 1940-45, and in the annual publications of the Irish Meteorological Service for 1946-48. A grid of 16 points over Ireland gave values of AAR. The internal percentages for 1940-48 were got from the data of the ten long-period stations available from 1845 onwards; Markree, Valentia, Shannon, Birr, Dublin, Cork, Waterford, Armagh, Londonderry, Belfast. These data for 1940-48 were made available from the study of Tabony (1979).

3.11 1949-77. The series was readily compiled from the monthly and annual series published by the Irish Meteorological Service, taking due account of updating of normal periods.

#### 4. Further data

4.1 The British Rainfall series for Ireland terminated in 1939. The Ireland series published by the Irish Meteorological Service began, so far as is known to the authors, in 1949. The makeshift series given by the authors for 1940-48 will be of use until it is replaced by an official Irish series.

4.2 Dixon (1953) refers to Irish weather diaries for 1716-34 and 1786-1810. Perhaps an analysis of these can be made as for the Ruttly and Blundell weather summaries.

#### References

- Frieda J. Nicholas and J. Glasspoole, 1932. General monthly rainfall over England and Wales, 1727 to 1931. British Rainfall 1931.
- J. Glasspoole, 1925. General monthly rainfall over the British Isles, 1881 to 1924. British Rainfall 1924.
- Royal Meteorological Society, 1926. Rainfall Atlas of the British Isles 1868-1923.
- F.E. Dixon, 1959. An Irish weather diary of 1711-1725. Quart. J. Roy. Met. Soc., 1959, pp. 371-385.
- F.E. Dixon, 1953. The annual precipitation at Dublin, Ireland. U.G.G.I. Ass. Met. Proc. Verb. Brussels 1953.
- R.C. Tabony, 1979. The Homogenisation and Analysis of European Rainfall Records. Met O 13 Branch Memorandum No. 76, May 1979.
- A.F. Jenkinson and M.C. Jackson 1975. The United Kingdom Flood Studies Report; Vol II, Meteorological Studies. Natural Environment Research Council, 1975.
- J. Ruttly, 1770. A chronological history of the weather and seasons, and of the prevailing diseases in Dublin. London 1770.
- N. Blundell. The great diurnal of Nicholas Blundell of Little Crosby, Lancashire, 1702-1728. Chester (Lancashire and Cheshire Record Society), 3 vols., 1968, 1970, 1972.



MONTHLY AND ANNUAL RAIN-FALL, INCHES

Tenthly rainfall for each year is given as per mille of the rainfall for the year. Annual rainfall is given as per cent of 1946-1975. The number of stations used is given for each year up to 1880.

| at   | W | Jan. | Feb. | March | April | May | June | July | Aug. | Sept. | Oct. | Nov. | Dec. | Year  |
|------|---|------|------|-------|-------|-----|------|------|------|-------|------|------|------|-------|
| 711  | 2 | 15   | 67   | 111   | 78    | 61  | 61   | 43   | 84   | 68    | 118  | 190  | 104  | 101-0 |
| 12   | 2 | 34   | 25   | 82    | 82    | 48  | 82   | 160  | 85   | 89    | 144  | 140  | 44   | 115-9 |
| 13   | 2 | 99   | 109  | 31    | 31    | 72  | 78   | 163  | 130  | 40    | 142  | 92   | 82   | 90-9  |
| 14   | 2 | 48   | 91   | 61    | 64    | 47  | 30   | 170  | 90   | 75    | 129  | 93   | 102  | 81-8  |
| 15   | 2 | 100  | 55   | 61    | 108   | 132 | 85   | 98   | 86   | 102   | 83   | 52   | 38   | 116-4 |
| 16   | 2 | 17   | 53   | 36    | 70    | 80  | 51   | 72   | 64   | 185   | 117  | 127  | 74   | 96-8  |
| 17   | 2 | 100  | 74   | 75    | 95    | 72  | 75   | 66   | 94   | 97    | 101  | 85   | 91   | 91-6  |
| 18   | 3 | 66   | 80   | 75    | 94    | 70  | 29   | 64   | 134  | 36    | 101  | 145  | 174  | 87-6  |
| 19   | 3 | 75   | 124  | 57    | 74    | 70  | 47   | 71   | 73   | 59    | 100  | 90   | 105  | 88-7  |
| 20   | 3 | 118  | 70   | 85    | 52    | 64  | 94   | 83   | 97   | 75    | 98   | 139  | 101  | 112-9 |
| 21   | 3 | 86   | 52   | 64    | 116   | 64  | 77   | 90   | 110  | 41    | 58   | 101  | 131  | 105-2 |
| 22   | 3 | 63   | 40   | 89    | 42    | 160 | 108  | 86   | 113  | 50    | 74   | 112  | 118  | 104-5 |
| 23   | 3 | 106  | 159  | 75    | 57    | 21  | 42   | 80   | 69   | 91    | 42   | 56   | 163  | 79-9  |
| 24   | 3 | 93   | 42   | 39    | 78    | 51  | 52   | 86   | 147  | 99    | 75   | 90   | 91   | 113-2 |
| 25   | 3 | 110  | 70   | 81    | 90    | 74  | 92   | 86   | 55   | 139   | 84   | 94   | 90   | 102-0 |
| 26   | 3 | 84   | 76   | 45    | 56    | 67  | 74   | 80   | 59   | 102   | 106  | 91   | 78   | 107-9 |
| 27   | 2 | 108  | 90   | 46    | 90    | 100 | 92   | 69   | 68   | 93    | 79   | 110  | 101  | 110-2 |
| 28   | 1 | 84   | 90   | 46    | 90    | 58  | 74   | 80   | 59   | 102   | 106  | 91   | 78   | 102-3 |
| 29   | 1 | 103  | 44   | 78    | 79    | 63  | 118  | 62   | 73   | 101   | 85   | 165  | 142  | 111-3 |
| 30   | 1 | 100  | 47   | 63    | 24    | 98  | 75   | 69   | 67   | 60    | 108  | 90   | 83   | 83-1  |
| 31   | 1 | 61   | 106  | 77    | 51    | 56  | 40   | 55   | 90   | 80    | 126  | 146  | 133  | 104-0 |
| 32   | 1 | 105  | 107  | 32    | 30    | 105 | 32   | 88   | 72   | 99    | 116  | 49   | 106  | 112-1 |
| 33   | 1 | 109  | 86   | 83    | 55    | 19  | 50   | 44   | 96   | 92    | 78   | 108  | 160  | 109-1 |
| 34   | 1 | 123  | 105  | 77    | 51    | 50  | 81   | 108  | 69   | 83    | 79   | 125  | 90   | 123-4 |
| 35   | 1 | 80   | 61   | 87    | 38    | 100 | 72   | 96   | 79   | 70    | 98   | 79   | 117  | 94-9  |
| 36   | 1 | 92   | 72   | 77    | 70    | 38  | 20   | 48   | 105  | 83    | 92   | 73   | 108  | 102-4 |
| 37   | 1 | 146  | 94   | 67    | 91    | 97  | 55   | 45   | 87   | 65    | 85   | 84   | 93   | 118-4 |
| 38   | 1 | 135  | 115  | 84    | 85    | 45  | 75   | 38   | 110  | 87    | 119  | 97   | 50   | 103-4 |
| 39   | 1 | 117  | 57   | 54    | 74    | 92  | 86   | 114  | 104  | 130   | 63   | 104  | 99   | 71-9  |
| 40   | 1 | 110  | 86   | 43    | 55    | 62  | 47   | 88   | 129  | 143   | 91   | 104  | 99   | 76-4  |
| 41   | 1 | 45   | 68   | 62    | 34    | 90  | 74   | 83   | 80   | 111   | 137  | 115  | 106  | 87-1  |
| 42   | 1 | 133  | 64   | 35    | 32    | 27  | 65   | 87   | 70   | 76    | 161  | 106  | 55   | 93-7  |
| 43   | 1 | 131  | 77   | 31    | 28    | 53  | 36   | 98   | 49   | 71    | 112  | 116  | 32   | 105-0 |
| 44   | 1 | 148  | 95   | 68    | 93    | 69  | 54   | 73   | 124  | 128   | 134  | 116  | 91   | 100-5 |
| 45   | 1 | 65   | 85   | 90    | 55    | 44  | 88   | 63   | 130  | 23    | 140  | 75   | 91   | 92-6  |
| 46   | 1 | 113  | 48   | 44    | 57    | 128 | 88   | 156  | 50   | 92    | 70   | 108  | 120  | 75-6  |
| 47   | 1 | 110  | 38   | 93    | 45    | 22  | 96   | 60   | 61   | 136   | 86   | 67   | 44   | 82-5  |
| 48   | 1 | 183  | 89   | 59    | 55    | 85  | 75   | 111  | 91   | 80    | 127  | 61   | 62   | 83-9  |
| 49   | 1 | 83   | 59   | 104   | 70    | 111 | 41   | 91   | 111  | 101   | 78   | 60   | 61   | 93-7  |
| 50   | 1 | 165  | 57   | 77    | 104   | 55  | 40   | 91   | 139  | 71    | 112  | 106  | 76   |       |
| 1750 | 1 | 73   | 95   | 69    | 44    | 22  | 95   | 98   | 139  | 71    | 112  | 106  | 76   |       |



Values of *Monthly and annual rainfall, Ireland*  
1711-1977

| Year | n | Jan. | Feb. | March | April | May | June | July | Aug. | Sept. | Oct. | Nov. | Dec. | Year  |
|------|---|------|------|-------|-------|-----|------|------|------|-------|------|------|------|-------|
| 1751 | 1 | 97   | 64   | 90    | 55    | 61  | 18   | 138  | 103  | 126   | 83   | 95   | 68   | 104.9 |
| 52   | 1 | 114  | 48   | 45    | 25    | 109 | 89   | 145  | 131  | 65    | 65   | 75   | 51   | 99.8  |
| 53   | 1 | 100  | 115  | 93    | 57    | 96  | 76   | 90   | 106  | 50    | 64   | 50   | 109  | 101.7 |
| 54   | 1 | 143  | 70   | 67    | 59    | 67  | 154  | 95   | 84   | 52    | 59   | 109  | 95   | 96.5  |
| 55   | 1 | 29   | 32   | 90    | 107   | 83  | 80   | 106  | 109  | 121   | 117  | 42   | 43   | 111.0 |
| 56   | 1 | 115  | 56   | 53    | 118   | 91  | 108  | 45   | 78   | 59    | 117  | 42   | 43   | 119.9 |
| 57   | 2 | 71   | 38   | 95    | 110   | 75  | 49   | 104  | 168  | 38    | 72   | 111  | 73   | 95.6  |
| 58   | 2 | 63   | 94   | 74    | 54    | 48  | 49   | 169  | 100  | 63    | 78   | 90   | 118  | 101.9 |
| 59   | 2 | 85   | 32   | 124   | 73    | 59  | 115  | 51   | 90   | 84    | 139  | 80   | 68   | 82.6  |
| 60   | 2 | 88   | 85   | 22    | 29    | 49  | 95   | 36   | 98   | 105   | 147  | 129  | 89   | 106.6 |
| 61   | 2 | 26   | 84   | 73    | 67    | 70  | 82   | 50   | 89   | 81    | 164  | 125  | 39   | 92.4  |
| 62   | 2 | 93   | 53   | 99    | 59    | 34  | 30   | 62   | 117  | 101   | 227  | 86   | 56   | 81.7  |
| 63   | 2 | 40   | 81   | 39    | 79    | 46  | 90   | 137  | 91   | 73    | 90   | 92   | 69   | 113.5 |
| 64   | 2 | 164  | 93   | 45    | 43    | 49  | 67   | 120  | 101  | 78    | 175  | 67   | 56   | 106.3 |
| 65   | 2 | 130  | 61   | 111   | 123   | 24  | 44   | 28   | 62   | 100   | 112  | 69   | 56   | 89.2  |
| 66   | 1 | 08   | 83   | 28    | 88    | 147 | 141  | 95   | 96   | 86    | 60   | 128  | 53   | 98.5  |
| 67   | 1 | 28   | 109  | 91    | 21    | 38  | 16   | 180  | 58   | 113   | 75   | 117  | 79   | 130.2 |
| 68   | 1 | 48   | 137  | 28    | 59    | 53  | 133  | 115  | 136  | 179   | 53   | 72   | 79   | 93.6  |
| 69   | 1 | 55   | 71   | 36    | 46    | 53  | 144  | 76   | 136  | 97    | 80   | 192  | 120  | 108.1 |
| 70   | 1 | 37   | 43   | 64    | 60    | 59  | 59   | 93   | 90   | 69    | 206  | 83   | 103  | 83.1  |
| 71   | 1 | 73   | 36   | 39    | 44    | 63  | 100  | 64   | 148  | 99    | 99   | 137  | 47   | 107.4 |
| 72   | 1 | 71   | 74   | 69    | 38    | 125 | 42   | 39   | 70   | 148   | 125  | 119  | 100  | 110.4 |
| 73   | 1 | 81   | 53   | 23    | 58    | 135 | 92   | 106  | 90   | 154   | 41   | 62   | 70   | 91.1  |
| 74   | 1 | 112  | 87   | 44    | 66    | 76  | 92   | 137  | 128  | 118   | 142  | 92   | 55   | 115.5 |
| 75   | 1 | 76   | 99   | 60    | 28    | 27  | 39   | 125  | 147  | 138   | 67   | 91   | 64   | 95.9  |
| 76   | 1 | 46   | 112  | 47    | 30    | 40  | 109  | 108  | 103  | 50    | 170  | 101  | 49   | 95.4  |
| 77   | 1 | 45   | 60   | 65    | 74    | 66  | 81   | 146  | 42   | 66    | 151  | 110  | 128  | 111.0 |
| 78   | 1 | 67   | 34   | 61    | 33    | 81  | 80   | 154  | 35   | 144   | 139  | 84   | 141  | 97.0  |
| 79   | 1 | 19   | 33   | 24    | 68    | 79  | 80   | 77   | 35   | 178   | 158  | 97   | 19   | 81.8  |
| 80   | 1 | 39   | 80   | 70    | 110   | 77  | 60   | 72   | 135  | 102   | 24   | 168  | 76   | 90.2  |
| 81   | 1 | 66   | 109  | 17    | 69    | 60  | 108  | 71   | 159  | 122   | 93   | 47   | 47   | 112.7 |
| 82   | 1 | 95   | 24   | 64    | 112   | 117 | 49   | 87   | 130  | 137   | 82   | 82   | 35   | 100.5 |
| 83   | 1 | 97   | 80   | 53    | 15    | 104 | 98   | 117  | 119  | 63    | 19   | 95   | 65   | 86.8  |
| 84   | 1 | 86   | 52   | 58    | 93    | 79  | 154  | 117  | 218  | 140   | 137  | 114  | 76   | 83.4  |
| 85   | 1 | 72   | 24   | 19    | 26    | 40  | 48   | 86   | 135  | 182   | 76   | 86   | 107  | 89.6  |
| 86   | 1 | 93   | 33   | 37    | 26    | 86  | 73   | 66   | 94   | 182   | 189  | 97   | 110  | 103.6 |
| 87   | 1 | 23   | 66   | 74    | 39    | 46  | 62   | 153  | 94   | 47    | 189  | 97   | 26   | 64.5  |
| 88   | 1 | 97   | 92   | 82    | 74    | 53  | 64   | 166  | 98   | 111   | 76   | 61   | 26   | 64.5  |
| 89   | 1 | 72   | 94   | 82    | 59    | 79  | 113  | 119  | 23   | 91    | 127  | 80   | 119  | 112.6 |
| 1790 | 1 | 93   | 32   | 21    | 35    | 74  | 93   | 126  | 94   | 101   | 69   | 100  | 162  | 97.7  |



Values of Monthly and annual rainfall, Ireland  
1711-1977

| Year | n | Jan. | Feb. | March | April | May | June | July | Aug. | Sept. | Oct. | Nov. | Dec. | Year  |
|------|---|------|------|-------|-------|-----|------|------|------|-------|------|------|------|-------|
| 1791 | 1 | 135  | 82   | 44    | 80    | 54  | 29   | 97   | 109  | 42    | 96   | 126  | 109  | 102.9 |
| 1792 | 3 | 67   | 66   | 78    | 91    | 80  | 46   | 84   | 128  | 119   | 90   | 39   | 112  | 121.0 |
| 1793 | 3 | 79   | 127  | 99    | 62    | 42  | 73   | 60   | 118  | 78    | 72   | 93   | 98   | 88.3  |
| 1794 | 2 | 39   | 103  | 52    | 88    | 48  | 26   | 82   | 83   | 90    | 107  | 183  | 99   | 114.4 |
| 1795 | 2 | 65   | 94   | 78    | 83    | 26  | 93   | 52   | 59   | 15    | 203  | 125  | 107  | 101.4 |
| 1796 | 3 | 137  | 80   | 33    | 45    | 145 | 66   | 141  | 23   | 113   | 61   | 63   | 93   | 83.3  |
| 1797 | 3 | 59   | 20   | 64    | 54    | 92  | 49   | 90   | 144  | 118   | 94   | 93   | 123  | 98.4  |
| 1798 | 3 | 116  | 50   | 36    | 70    | 38  | 51   | 165  | 74   | 127   | 87   | 129  | 57   | 91.5  |
| 1799 | 4 | 63   | 104  | 52    | 111   | 55  | 43   | 69   | 132  | 102   | 120  | 94   | 55   | 99.5  |
| 1800 | 3 | 136  | 48   | 45    | 130   | 78  | 26   | 28   | 29   | 129   | 129  | 106  | 106  | 91.7  |
| 01   | 3 | 111  | 76   | 85    | 26    | 65  | 28   | 146  | 22   | 109   | 137  | 67   | 135  | 94.0  |
| 02   | 3 | 62   | 84   | 43    | 66    | 25  | 71   | 160  | 92   | 58    | 137  | 36   | 171  | 99.7  |
| 03   | 3 | 72   | 91   | 64    | 70    | 88  | 78   | 38   | 94   | 67    | 36   | 124  | 78   | 76.0  |
| 04   | 3 | 138  | 30   | 110   | 51    | 95  | 55   | 72   | 117  | 32    | 40   | 89   | 128  | 106.2 |
| 05   | 3 | 121  | 81   | 81    | 38    | 66  | 58   | 145  | 110  | 101   | 43   | 28   | 144  | 84.2  |
| 06   | 3 | 114  | 73   | 39    | 32    | 80  | 34   | 90   | 97   | 76    | 66   | 155  | 144  | 107.2 |
| 07   | 3 | 62   | 70   | 23    | 46    | 103 | 51   | 96   | 117  | 155   | 126  | 84   | 67   | 160.5 |
| 08   | 3 | 70   | 54   | 17    | 65    | 84  | 62   | 132  | 147  | 57    | 137  | 103  | 72   | 95.0  |
| 09   | 3 | 109  | 85   | 35    | 57    | 72  | 74   | 51   | 174  | 114   | 48   | 60   | 121  | 107.7 |
| 10   | 3 | 71   | 56   | 88    | 44    | 26  | 42   | 122  | 107  | 73    | 91   | 139  | 141  | 92.9  |
| 11   | 3 | 64   | 107  | 66    | 82    | 111 | 49   | 55   | 104  | 42    | 116  | 104  | 100  | 107.6 |
| 12   | 3 | 55   | 123  | 82    | 38    | 90  | 77   | 76   | 78   | 75    | 158  | 108  | 40   | 99.8  |
| 13   | 5 | 81   | 135  | 43    | 57    | 112 | 48   | 83   | 38   | 101   | 147  | 104  | 51   | 94.6  |
| 14   | 5 | 28   | 54   | 42    | 96    | 48  | 55   | 73   | 77   | 37    | 130  | 181  | 178  | 98.0  |
| 15   | 5 | 47   | 87   | 107   | 38    | 92  | 79   | 51   | 97   | 117   | 129  | 80   | 76   | 96.0  |
| 16   | 4 | 63   | 37   | 59    | 53    | 89  | 66   | 140  | 78   | 117   | 126  | 55   | 117  | 107.8 |
| 17   | 4 | 77   | 160  | 77    | 08    | 53  | 95   | 142  | 141  | 32    | 39   | 126  | 110  | 103.4 |
| 18   | 5 | 126  | 70   | 128   | 113   | 42  | 57   | 66   | 31   | 101   | 108  | 92   | 66   | 111.1 |
| 19   | 5 | 139  | 106  | 45    | 60    | 83  | 90   | 67   | 57   | 72    | 97   | 77   | 107  | 105.7 |
| 20   | 5 | 76   | 44   | 80    | 41    | 145 | 69   | 52   | 129  | 89    | 98   | 72   | 108  | 89.7  |
| 21   | 5 | 53   | 16   | 108   | 100   | 55  | 11   | 51   | 92   | 114   | 94   | 144  | 162  | 100.8 |
| 22   | 5 | 44   | 93   | 106   | 60    | 47  | 30   | 165  | 90   | 46    | 130  | 141  | 48   | 107.1 |
| 23   | 6 | 70   | 81   | 73    | 74    | 108 | 38   | 144  | 99   | 77    | 75   | 45   | 119  | 108.2 |
| 24   | 6 | 71   | 52   | 73    | 55    | 20  | 54   | 35   | 58   | 89    | 189  | 153  | 151  | 93.9  |
| 25   | 5 | 84   | 47   | 64    | 51    | 86  | 71   | 20   | 86   | 102   | 142  | 127  | 120  | 94.9  |
| 26   | 5 | 87   | 181  | 68    | 57    | 20  | 10   | 77   | 113  | 82    | 123  | 86   | 94   | 82.1  |
| 27   | 5 | 75   | 40   | 68    | 53    | 86  | 87   | 63   | 88   | 67    | 88   | 62   | 143  | 97.3  |
| 28   | 5 | 103  | 83   | 51    | 93    | 51  | 55   | 126  | 98   | 53    | 58   | 98   | 131  | 112.9 |
| 29   | 5 | 42   | 61   | 43    | 114   | 44  | 74   | 112  | 187  | 85    | 119  | 64   | 58   | 90.6  |
| 1830 | 5 | 40   | 72   | 68    | 79    | 80  | 61   | 105  | 81   | 130   | 63   | 120  | 101  | 92.7  |

Values of *Monthly and annual rainfall, Ireland*  
1711-1977

| yr   | n  | Jan. | Feb. | March | April | May | June | July | Aug. | Sept. | Oct. | Nov. | Dec. | Year  |
|------|----|------|------|-------|-------|-----|------|------|------|-------|------|------|------|-------|
| 131  | 4  | 40   | 81   | 97    | 38    | 19  | 63   | 75   | 66   | 75    | 130  | 173  | 143  | 104.2 |
| 32   | 4  | 49   | 59   | 84    | 60    | 44  | 99   | 44   | 42   | 42    | 119  | 134  | 152  | 88.3  |
| 33   | 4  | 21   | 118  | 30    | 60    | 41  | 109  | 61   | 44   | 101   | 102  | 137  | 176  | 107.4 |
| 34   | 4  | 182  | 97   | 65    | 14    | 45  | 100  | 112  | 81   | 78    | 87   | 77   | 62   | 93.7  |
| 35   | 4  | 75   | 132  | 80    | 27    | 96  | 35   | 76   | 69   | 125   | 104  | 125  | 56   | 102.0 |
| 36   | 6  | 89   | 43   | 105   | 51    | 08  | 76   | 130  | 54   | 116   | 114  | 127  | 87   | 102.1 |
| 37   | 7  | 63   | 119  | 36    | 64    | 54  | 94   | 103  | 72   | 57    | 101  | 110  | 122  | 92.2  |
| 38   | 7  | 52   | 81   | 83    | 73    | 46  | 78   | 111  | 96   | 80    | 82   | 139  | 79   | 95.7  |
| 39   | 7  | 66   | 68   | 80    | 45    | 20  | 75   | 94   | 110  | 85    | 53   | 132  | 91   | 106.5 |
| 40   | 6  | 146  | 79   | 13    | 31    | 91  | 65   | 78   | 96   | 90    | 133  | 100  | 100  | 84.8  |
| 41   | 7  | 64   | 67   | 87    | 50    | 62  | 61   | 106  | 104  | 94    | 58   | 159  | 75   | 96.2  |
| 42   | 7  | 90   | 96   | 62    | 17    | 99  | 78   | 80   | 51   | 94    | 127  | 106  | 43   | 91.7  |
| 43   | 9  | 83   | 54   | 84    | 104   | 08  | 106  | 109  | 73   | 47    | 151  | 122  | 66   | 91.2  |
| 44   | 9  | 75   | 110  | 47    | 41    | 43  | 83   | 83   | 115  | 61    | 114  | 125  | 96   | 100.0 |
| 45   | 12 | 130  | 43   | 94    | 61    | 52  | 46   | 75   | 47   | 65    | 84   | 110  | 37   | 109.5 |
| 46   | 13 | 106  | 52   | 53    | 114   | 108 | 46   | 38   | 144  | 65    | 132  | 102  | 111  | 95.2  |
| 47   | 12 | 110  | 66   | 79    | 86    | 32  | 46   | 80   | 144  | 132   | 101  | 87   | 108  | 109.7 |
| 48   | 12 | 67   | 122  | 79    | 82    | 76  | 83   | 97   | 96   | 67    | 57   | 116  | 111  | 99.9  |
| 49   | 12 | 106  | 42   | 35    | 96    | 64  | 18   | 80   | 144  | 132   | 121  | 154  | 36   | 93.6  |
| 50   | 13 | 111  | 87   | 31    | 136   | 42  | 59   | 97   | 86   | 48    | 121  | 45   | 65   | 90.6  |
| 51   | 16 | 196  | 55   | 94    | 55    | 52  | 100  | 91   | 88   | 39    | 70   | 154  | 157  | 126.1 |
| 52   | 17 | 125  | 74   | 30    | 31    | 42  | 133  | 48   | 79   | 64    | 167  | 100  | 113  | 94.3  |
| 53   | 19 | 161  | 38   | 68    | 78    | 31  | 69   | 108  | 63   | 54    | 94   | 81   | 113  | 83.5  |
| 54   | 20 | 150  | 41   | 42    | 15    | 111 | 84   | 125  | 123  | 56    | 133  | 58   | 97   | 79.5  |
| 55   | 17 | 20   | 67   | 94    | 44    | 99  | 63   | 60   | 96   | 103   | 80   | 49   | 112  | 88.7  |
| 56   | 19 | 108  | 86   | 33    | 80    | 130 | 90   | 64   | 67   | 88    | 83   | 91   | 68   | 89.3  |
| 57   | 19 | 97   | 60   | 100   | 129   | 62  | 39   | 91   | 70   | 91    | 89   | 65   | 145  | 88.6  |
| 58   | 18 | 63   | 67   | 54    | 143   | 82  | 42   | 67   | 92   | 132   | 71   | 114  | 113  | 88.3  |
| 59   | 19 | 89   | 53   | 96    | 113   | 18  | 150  | 60   | 132  | 48    | 70   | 68   | 74   | 107.5 |
| 60   | 18 | 141  | 43   | 77    | 45    | 88  | 82   | 143  | 122  | 132   | 73   | 90   | 61   | 109.2 |
| 61   | 28 | 67   | 85   | 101   | 31    | 13  | 78   | 91   | 63   | 55    | 110  | 69   | 105  | 112.7 |
| 62   | 31 | 134  | 36   | 88    | 85    | 83  | 80   | 24   | 109  | 104   | 173  | 104  | 83   | 94.8  |
| 63   | 36 | 107  | 37   | 81    | 43    | 55  | 82   | 36   | 61   | 120   | 113  | 171  | 82   | 84.4  |
| 64   | 48 | 86   | 50   | 94    | 49    | 54  | 23   | 83   | 109  | 18    | 124  | 128  | 114  | 104.4 |
| 65   | 53 | 106  | 93   | 68    | 31    | 100 | 91   | 41   | 95   | 120   | 68   | 78   | 103  | 100.3 |
| 66   | 58 | 136  | 82   | 90    | 59    | 38  | 32   | 103  | 77   | 68    | 132  | 30   | 54   | 94.4  |
| 67   | 59 | 105  | 87   | 97    | 99    | 117 | 40   | 32   | 123  | 120   | 74   | 90   | 172  | 104.9 |
| 68   | 59 | 104  | 68   | 88    | 61    | 58  | 40   | 32   | 123  | 90    | 47   | 96   | 132  | 98.8  |
| 69   | 59 | 136  | 90   | 72    | 66    | 102 | 28   | 49   | 39   | 144   | 47   | 96   | 132  | 86.3  |
| 1870 | 60 | 111  | 92   | 75    | 39    | 82  | 34   | 41   | 64   | 88    | 222  | 69   | 83   |       |

# Values of *Monthly and annual rainfall, Ireland* 1711-1977

| yr   | n  | Jan. | Feb. | March | April | May | June | July | Aug. | Sept. | Oct. | Nov. | Dec. | Year  |
|------|----|------|------|-------|-------|-----|------|------|------|-------|------|------|------|-------|
| 371  | 60 | 114  | 92   | 59    | 106   | 21  | 74   | 147  | 69   | 83    | 97   | 67   | 71   | 97.8  |
| 72   | 66 | 109  | 84   | 66    | 53    | 43  | 80   | 48   | 84   | 90    | 101  | 103  | 139  | 127.4 |
| 73   | 69 | 157  | 38   | 92    | 33    | 55  | 46   | 125  | 153  | 87    | 111  | 71   | 32   | 93.5  |
| 74   | 66 | 78   | 70   | 51    | 61    | 40  | 41   | 76   | 121  | 160   | 133  | 109  | 120  | 96.7  |
| 75   | 62 | 143  | 43   | 36    | 27    | 58  | 43   | 74   | 73   | 136   | 150  | 111  | 63   | 102.1 |
| 76   | 65 | 42   | 109  | 90    | 64    | 16  | 63   | 42   | 88   | 104   | 116  | 104  | 182  | 109.2 |
| 77   | 60 | 134  | 59   | 67    | 87    | 59  | 63   | 71   | 100  | 58    | 96   | 117  | 89   | 122.0 |
| 78   | 56 | 95   | 61   | 46    | 69    | 130 | 132  | 34   | 118  | 92    | 104  | 58   | 61   | 94.2  |
| 79   | 55 | 83   | 101  | 57    | 61    | 70  | 143  | 121  | 115  | 122   | 44   | 30   | 89   | 98.0  |
| 80   | 56 | 39   | 94   | 86    | 44    | 32  | 85   | 148  | 48   | 82    | 79   | 117  | 61   | 98.3  |
| 81   |    | 32   | 113  | 84    | 87    | 55  | 113  | 54   | 116  | 66    | 93   | 124  | 109  | 102.4 |
| 82   |    | 62   | 73   | 72    | 51    | 50  | 77   | 110  | 73   | 105   | 87   | 130  | 55   | 116.2 |
| 83   |    | 136  | 125  | 40    | 43    | 64  | 55   | 91   | 96   | 70    | 73   | 94   | 119  | 108.2 |
| 84   |    | 140  | 127  | 100   | 81    | 70  | 25   | 93   | 52   | 147   | 114  | 87   | 51   | 94.9  |
| 85   |    | 93   | 117  | 70    | 43    | 33  | 36   | 56   | 81   | 89    | 123  | 75   | 128  | 109.4 |
| 86   |    | 96   | 74   | 88    | 51    | 94  | 17   | 84   | 62   | 106   | 90   | 121  | 117  | 71.5  |
| 87   |    | 125  | 64   | 56    | 57    | 53  | 118  | 88   | 106  | 29    | 56   | 125  | 136  | 96.5  |
| 88   |    | 75   | 26   | 97    | 80    | 71  | 22   | 72   | 148  | 52    | 137  | 57   | 108  | 90.6  |
| 89   |    | 89   | 81   | 59    | 47    | 68  | 79   | 85   | 85   | 84    | 61   | 170  | 69   | 93.5  |
| 90   |    | 137  | 39   | 89    | 61    | 75  | 66   | 57   | 160  | 79    | 139  | 91   | 157  | 99.0  |
| 91   |    | 54   | 09   | 50    | 32    | 105 | 22   | 85   | 154  | 101   | 91   | 134  | 68   | 94.3  |
| 92   |    | 68   | 69   | 27    | 38    | 52  | 60   | 77   | 137  | 67    | 93   | 70   | 147  | 76.8  |
| 93   |    | 103  | 124  | 32    | 95    | 72  | 57   | 96   | 71   | 15    | 115  | 97   | 94   | 100.9 |
| 94   |    | 128  | 104  | 56    | 52    | 21  | 53   | 112  | 137  | 26    | 103  | 129  | 142  | 96.4  |
| 95   |    | 106  | 24   | 95    | 35    | 11  | 73   | 145  | 58   | 58    | 100  | 36   | 161  | 92.8  |
| 96   |    | 46   | 55   | 125   | 89    | 42  | 100  | 52   | 124  | 86    | 74   | 105  | 109  | 112.1 |
| 97   |    | 57   | 65   | 125   | 99    | 80  | 71   | 36   | 121  | 75    | 112  | 115  | 91   | 95.4  |
| 98   |    | 73   | 83   | 35    | 97    | 77  | 56   | 62   | 70   | 41    | 50   | 85   | 181  | 98.7  |
| 99   |    | 120  | 88   | 46    | 90    | 66  | 102  | 63   | 106  | 41    | 118  | 134  | 113  | 113.7 |
| 1900 |    | 101  | 79   | 20    | 57    | 46  | 70   | 35   | 90   | 141   | 94   | 89   | 119  | 94.9  |
| 01   |    | 112  | 44   | 82    | 78    | 46  | 67   | 78   | 69   | 80    | 75   | 147  | 96   | 90.9  |
| 02   |    | 81   | 87   | 69    | 75    | 76  | 49   | 92   | 114  | 88    | 115  | 59   | 78   | 122.6 |
| 03   |    | 121  | 81   | 122   | 35    | 49  | 46   | 92   | 114  | 88    | 62   | 74   | 79   | 99.8  |
| 04   |    | 115  | 127  | 71    | 63    | 66  | 49   | 92   | 114  | 88    | 52   | 118  | 87   | 88.0  |
| 05   |    | 90   | 60   | 152   | 77    | 43  | 63   | 46   | 157  | 55    | 133  | 75   | 94   | 91.9  |
| 06   |    | 147  | 90   | 70    | 56    | 101 | 50   | 62   | 86   | 36    | 128  | 91   | 120  | 97.9  |
| 07   |    | 43   | 66   | 83    | 73    | 101 | 107  | 66   | 88   | 34    | 133  | 68   | 118  | 94.5  |
| 08   |    | 93   | 71   | 109   | 66    | 71  | 48   | 67   | 92   | 145   | 52   | 51   | 136  | 91.9  |
| 09   |    | 90   | 53   | 97    | 122   | 60  | 50   | 79   | 39   | 64    | 159  | 96   | 103  | 107.7 |
| 1910 |    | 97   | 131  | 60    | 57    | 59  | 99   | 78   | 135  | 24    | 61   | 96   | 103  |       |



Values of *Monthly and annual rainfall, Ireland*  
1711-1977

| Year | Dec. | Nov. | Oct. | Sept. | Aug. | July | June | May | April | March | Feb. | Jan. |
|------|------|------|------|-------|------|------|------|-----|-------|-------|------|------|
| 1971 | 178  | 130  | 108  | 60    | 63   | 87   | 65   | 51  | 62    | 58    | 86   | 52   |
| 1972 | 127  | 77   | 81   | 24    | 109  | 91   | 120  | 36  | 31    | 117   | 89   | 98   |
| 1973 | 83   | 104  | 101  | 93    | 36   | 25   | 64   | 94  | 94    | 104   | 47   | 155  |
| 1974 | 159  | 83   | 109  | 58    | 72   | 73   | 53   | 46  | 42    | 113   | 137  | 54   |
| 1975 | 83   | 123  | 142  | 46    | 70   | 45   | 56   | 102 | 58    | 31    | 105  | 102  |
| 1976 | 74   | 106  | 109  | 35    | 174  | 60   | 57   | 56  | 84    | 50    | 128  | 70   |
| 1977 | 128  | 95   | 109  | 144   | 72   | 85   | 37   | 57  | 33    | 45    | 110  | 59   |
| 1978 | 192  | 83   | 96   | 84    | 83   | 34   | 76   | 77  | 51    | 91    | 35   | 128  |
| 1979 | 91   | 116  | 106  | 64    | 52   | 93   | 52   | 86  | 83    | 86    | 65   | 127  |
| 1980 | 113  | 136  | 92   | 59    | 117  | 109  | 14   | 63  | 32    | 110   | 45   | 131  |
| 1981 | 82   | 91   | 83   | 116   | 86   | 81   | 76   | 77  | 57    | 43    | 88   | 170  |
| 1982 | 35   | 136  | 106  | 28    | 112  | 79   | 81   | 39  | 39    | 100   | 68   | 116  |
| 1983 | 87   | 111  | 124  | 55    | 102  | 39   | 100  | 30  | 49    | 90    | 101  | 127  |
| 1984 | 130  | 87   | 107  | 93    | 128  | 80   | 54   | 63  | 32    | 19    | 86   | 48   |
| 1985 | 130  | 130  | 133  | 79    | 113  | 91   | 52   | 40  | 42    | 63    | 20   | 127  |
| 1986 | 166  | 169  | 169  | 66    | 72   | 88   | 102  | 94  | 65    | 57    | 81   | 77   |
| 1987 | 72   | 164  | 106  | 85    | 64   | 117  | 41   | 86  | 83    | 103   | 108  | 125  |
| 1988 | 118  | 132  | 115  | 41    | 105  | 91   | 43   | 61  | 66    | 81    | 09   | 112  |
| 1989 | 103  | 99   | 105  | 41    | 73   | 49   | 128  | 30  | 76    | 42    | 106  | 44   |
| 1990 | 103  | 118  | 133  | 100   | 42   | 28   | 75   | 36  | 46    | 64    | 71   | 131  |
| 1991 | 77   | 56   | 67   | 93    | 70   | 110  | 48   | 51  | 69    | 85    | 125  | 156  |
| 1992 | 105  | 191  | 152  | 63    | 72   | 110  | 85   | 79  | 05    | 41    | 45   | 115  |
| 1993 | 83   | 127  | 133  | 56    | 49   | 97   | 35   | 33  | 48    | 81    | 94   | 121  |
| 1994 | 105  | 168  | 150  | 36    | 102  | 79   | 26   | 75  | 50    | 97    | 110  | 95   |
| 1995 | 65   | 23   | 66   | 113   | 125  | 92   | 11   | 109 | 59    | 94    | 39   | 144  |
| 1996 | 70   | 77   | 118  | 82    | 115  | 58   | 82   | 102 | 53    | 29    | 54   | 160  |
| 1997 | 112  | 147  | 124  | 128   | 77   | 93   | 62   | 44  | 62    | 15    | 34   | 102  |
| 1998 | 125  | 31   | 103  | 89    | 57   | 119  | 111  | 102 | 44    | 39    | 96   | 84   |
| 1999 | 113  | 110  | 54   | 135   | 130  | 75   | 81   | 48  | 28    | 46    | 73   | 107  |
| 2000 | 85   | 113  | 60   | 70    | 21   | 76   | 95   | 94  | 86    | 135   | 61   | 104  |
| 2001 | 157  | 76   | 84   | 76    | 82   | 58   | 80   | 51  | 56    | 58    | 54   | 168  |
| 2002 | 128  | 113  | 166  | 61    | 96   | 69   | 29   | 55  | 74    | 59    | 73   | 77   |
| 2003 | 84   | 81   | 81   | 137   | 135  | 97   | 56   | 26  | 68    | 48    | 127  | 60   |
| 2004 | 94   | 9    | 9    | 9     | 9    | 9    | 9    | 9   | 9     | 9     | 9    | 9    |
| 2005 | 94   | 9    | 9    | 9     | 9    | 9    | 9    | 9   | 9     | 9     | 9    | 9    |
| 2006 | 94   | 9    | 9    | 9     | 9    | 9    | 9    | 9   | 9     | 9     | 9    | 9    |
| 2007 | 94   | 9    | 9    | 9     | 9    | 9    | 9    | 9   | 9     | 9     | 9    | 9    |
| 2008 | 94   | 9    | 9    | 9     | 9    | 9    | 9    | 9   | 9     | 9     | 9    | 9    |
| 2009 | 94   | 9    | 9    | 9     | 9    | 9    | 9    | 9   | 9     | 9     | 9    | 9    |
| 2010 | 94   | 9    | 9    | 9     | 9    | 9    | 9    | 9   | 9     | 9     | 9    | 9    |
| 2011 | 94   | 9    | 9    | 9     | 9    | 9    | 9    | 9   | 9     | 9     | 9    | 9    |
| 2012 | 94   | 9    | 9    | 9     | 9    | 9    | 9    | 9   | 9     | 9     | 9    | 9    |
| 2013 | 94   | 9    | 9    | 9     | 9    | 9    | 9    | 9   | 9     | 9     | 9    | 9    |
| 2014 | 94   | 9    | 9    | 9     | 9    | 9    | 9    | 9   | 9     | 9     | 9    | 9    |
| 2015 | 94   | 9    | 9    | 9     | 9    | 9    | 9    | 9   | 9     | 9     | 9    | 9    |
| 2016 | 94   | 9    | 9    | 9     | 9    | 9    | 9    | 9   | 9     | 9     | 9    | 9    |
| 2017 | 94   | 9    | 9    | 9     | 9    | 9    | 9    | 9   | 9     | 9     | 9    | 9    |
| 2018 | 94   | 9    | 9    | 9     | 9    | 9    | 9    | 9   | 9     | 9     | 9    | 9    |
| 2019 | 94   | 9    | 9    | 9     | 9    | 9    | 9    | 9   | 9     | 9     | 9    | 9    |
| 2020 | 94   | 9    | 9    | 9     | 9    | 9    | 9    | 9   | 9     | 9     | 9    | 9    |
| 2021 | 94   | 9    | 9    | 9     | 9    | 9    | 9    | 9   | 9     | 9     | 9    | 9    |
| 2022 | 94   | 9    | 9    | 9     | 9    | 9    | 9    | 9   | 9     | 9     | 9    | 9    |
| 2023 | 94   | 9    | 9    | 9     | 9    | 9    | 9    | 9   | 9     | 9     | 9    | 9    |
| 2024 | 94   | 9    | 9    | 9     | 9    | 9    | 9    | 9   | 9     | 9     | 9    | 9    |
| 2025 | 94   | 9    | 9    | 9     | 9    | 9    | 9    | 9   | 9     | 9     | 9    | 9    |
| 2026 | 94   | 9    | 9    | 9     | 9    | 9    | 9    | 9   | 9     | 9     | 9    | 9    |
| 2027 | 94   | 9    | 9    | 9     | 9    | 9    | 9    | 9   | 9     | 9     | 9    | 9    |
| 2028 | 94   | 9    | 9    | 9     | 9    | 9    | 9    | 9   | 9     | 9     | 9    | 9    |
| 2029 | 94   | 9    | 9    | 9     | 9    | 9    | 9    | 9   | 9     | 9     | 9    | 9    |
| 2030 | 94   | 9    | 9    | 9     | 9    | 9    | 9    | 9   | 9     | 9     | 9    | 9    |
| 2031 | 94   | 9    | 9    | 9     | 9    | 9    | 9    | 9   | 9     | 9     | 9    | 9    |
| 2032 | 94   | 9    | 9    | 9     | 9    | 9    | 9    | 9   | 9     | 9     | 9    | 9    |
| 2033 | 94   | 9    | 9    | 9     | 9    | 9    | 9    | 9   | 9     | 9     | 9    | 9    |
| 2034 | 94   | 9    | 9    | 9     | 9    | 9    | 9    | 9   | 9     | 9     | 9    | 9    |
| 2035 | 94   | 9    | 9    | 9     | 9    | 9    | 9    | 9   | 9     | 9     | 9    | 9    |
| 2036 | 94   | 9    | 9    | 9     | 9    | 9    | 9    | 9   | 9     | 9     | 9    | 9    |
| 2037 | 94   | 9    | 9    | 9     | 9    | 9    | 9    | 9   | 9     | 9     | 9    | 9    |
| 2038 | 94   | 9    | 9    | 9     | 9    | 9    | 9    | 9   | 9     | 9     | 9    | 9    |
| 2039 | 94   | 9    | 9    | 9     | 9    | 9    | 9    | 9   | 9     | 9     | 9    | 9    |
| 2040 | 94   | 9    | 9    | 9     | 9    | 9    | 9    | 9   | 9     | 9     | 9    | 9    |
| 2041 | 94   | 9    | 9    | 9     | 9    | 9    | 9    | 9   | 9     | 9     | 9    | 9    |
| 2042 | 94   | 9    | 9    | 9     | 9    | 9    | 9    | 9   | 9     | 9     | 9    | 9    |
| 2043 | 94   | 9    | 9    | 9     | 9    | 9    | 9    | 9   | 9     | 9     | 9    | 9    |
| 2044 | 94   | 9    | 9    | 9     | 9    | 9    | 9    | 9   | 9     | 9     | 9    | 9    |
| 2045 | 94   | 9    | 9    | 9     | 9    | 9    | 9    | 9   | 9     | 9     | 9    | 9    |
| 2046 | 94   | 9    | 9    | 9     | 9    | 9    | 9    | 9   | 9     | 9     | 9    | 9    |
| 2047 | 94   | 9    | 9    | 9     | 9    | 9    | 9    | 9   | 9     | 9     | 9    | 9    |
| 2048 | 94   | 9    | 9    | 9     | 9    | 9    | 9    | 9   | 9     | 9     | 9    | 9    |
| 2049 | 94   | 9    | 9    | 9     | 9    | 9    | 9    | 9   | 9     | 9     | 9    | 9    |
| 2050 | 94   | 9    | 9    | 9     | 9    | 9    | 9    | 9   | 9     | 9     | 9    | 9    |

Values of Monthly and annual rainfall, Ireland  
1711-1977

| Year | Jan. | Feb. | March | April | May | June | July | Aug. | Sept. | Oct. | Nov. | Dec. | Year  |
|------|------|------|-------|-------|-----|------|------|------|-------|------|------|------|-------|
| 1951 | 99   | 81   | 75    | 44    | 44  | 48   | 57   | 102  | 97    | 47   | 170  | 136  | 708.7 |
| 52   | 151  | 32   | 67    | 66    | 71  | 70   | 34   | 99   | 64    | 142  | 81   | 123  | 86.0  |
| 53   | 45   | 56   | 24    | 79    | 64  | 36   | 140  | 117  | 126   | 94   | 118  | 101  | 85.0  |
| 54   | 64   | 93   | 77    | 26    | 77  | 55   | 75   | 62   | 110   | 143  | 113  | 105  | 118.6 |
| 55   | 118  | 98   | 39    | 71    | 46  | 129  | 20   | 52   | 86    | 65   | 88   | 137  | 89.2  |
| 56   | 114  | 31   | 86    | 24    | 54  | 67   | 117  | 115  | 127   | 76   | 57   | 140  | 104.5 |
| 57   | 130  | 79   | 92    | 29    | 93  | 40   | 92   | 67   | 169   | 118  | 33   | 97   | 105.6 |
| 58   | 123  | 89   | 49    | 25    | 47  | 89   | 102  | 104  | 115   | 60   | 55   | 96   | 122.1 |
| 59   | 80   | 30   | 87    | 87    | 59  | 59   | 60   | 33   | 42    | 145  | 123  | 207  | 101.4 |
| 60   | 88   | 67   | 55    | 61    | 58  | 58   | 107  | 84   | 94    | 91   | 72   | 108  | 125.1 |
| 61   | 150  | 94   | 27    | 114   | 45  | 45   | 60   | 68   | 103   | 113  | 81   | 80   | 99.3  |
| 62   | 133  | 48   | 80    | 67    | 42  | 47   | 67   | 110  | 135   | 52   | 160  | 107  | 97.3  |
| 63   | 28   | 52   | 135   | 73    | 74  | 68   | 70   | 100  | 66    | 124  | 74   | 50   | 93.1  |
| 64   | 49   | 56   | 103   | 70    | 82  | 75   | 72   | 97   | 70    | 106  | 124  | 146  | 101.4 |
| 65   | 123  | 09   | 78    | 71    | 74  | 90   | 47   | 78   | 82    | 58   | 59   | 143  | 113.8 |
| 66   | 89   | 132  | 47    | 116   | 74  | 92   | 70   | 64   | 68    | 111  | 69   | 101  | 116.5 |
| 67   | 76   | 102  | 56    | 33    | 124 | 27   | 48   | 89   | 123   | 167  | 112  | 66   | 105.2 |
| 68   | 115  | 30   | 72    | 64    | 57  | 60   | 34   | 73   | 49    | 116  | 125  | 138  | 105.2 |
| 69   | 186  | 61   | 42    | 74    | 99  | 75   | 44   | 58   | 104   | 80   | 155  | 55   | 87.7  |
| 70   | 110  | 115  | 52    | 90    | 32  | 53   | 82   | 72   | 104   | 104  | 120  | 62   | 103.1 |
| 71   | 116  | 75   | 71    | 54    | 62  | 93   | 62   | 104  | 55    | 105  | 131  | 122  | 79.4  |
| 72   | 131  | 91   | 80    | 90    | 104 | 68   | 73   | 47   | 13    | 61   | 135  | 110  | 180.0 |
| 73   | 101  | 83   | 35    | 48    | 99  | 41   | 104  | 104  | 106   | 65   | 83   | 87   | 94.9  |
| 74   | 180  | 94   | 40    | 31    | 75  | 36   | 87   | 90   | 143   | 54   | 105  | 55   | 109.3 |
| 75   | 195  | 49   | 49    | 75    | 28  | 24   | 91   | 49   | 150   | 130  | 91   | 103  | 85.6  |
| 76   | 117  | 61   | 89    | 31    | 99  | 49   | 72   | 12   | 113   | 162  | 108  | 102  | 93.8  |
| 1977 | 90   | 133  | 89    | 74    | 23  | 53   | 41   | 79   | 61    | 147  | 108  | 102  | 108.0 |
